# Supplementary material for: BRD9 defines a SWI/SNF sub-complex and constitutes a specific vulnerability in malignant rhabdoid tumors
Source: PubMed Central journal article supplement (PMC6479050; doi:10.1038/s41467-019-09891-7), 2019-04-23
Supplement: 41467_2019_9891_MOESM1_ESM.pdf [file 41467_2019_9891_MOESM1_ESM.pdf]

**BRD9 defines a novel SWI/SNF sub-complex and constitutes a specific vulnerability in  
malignant rhabdoid tumors**

**Wang et al.**

**Supplementary Information**

## Supplementary Figure 1

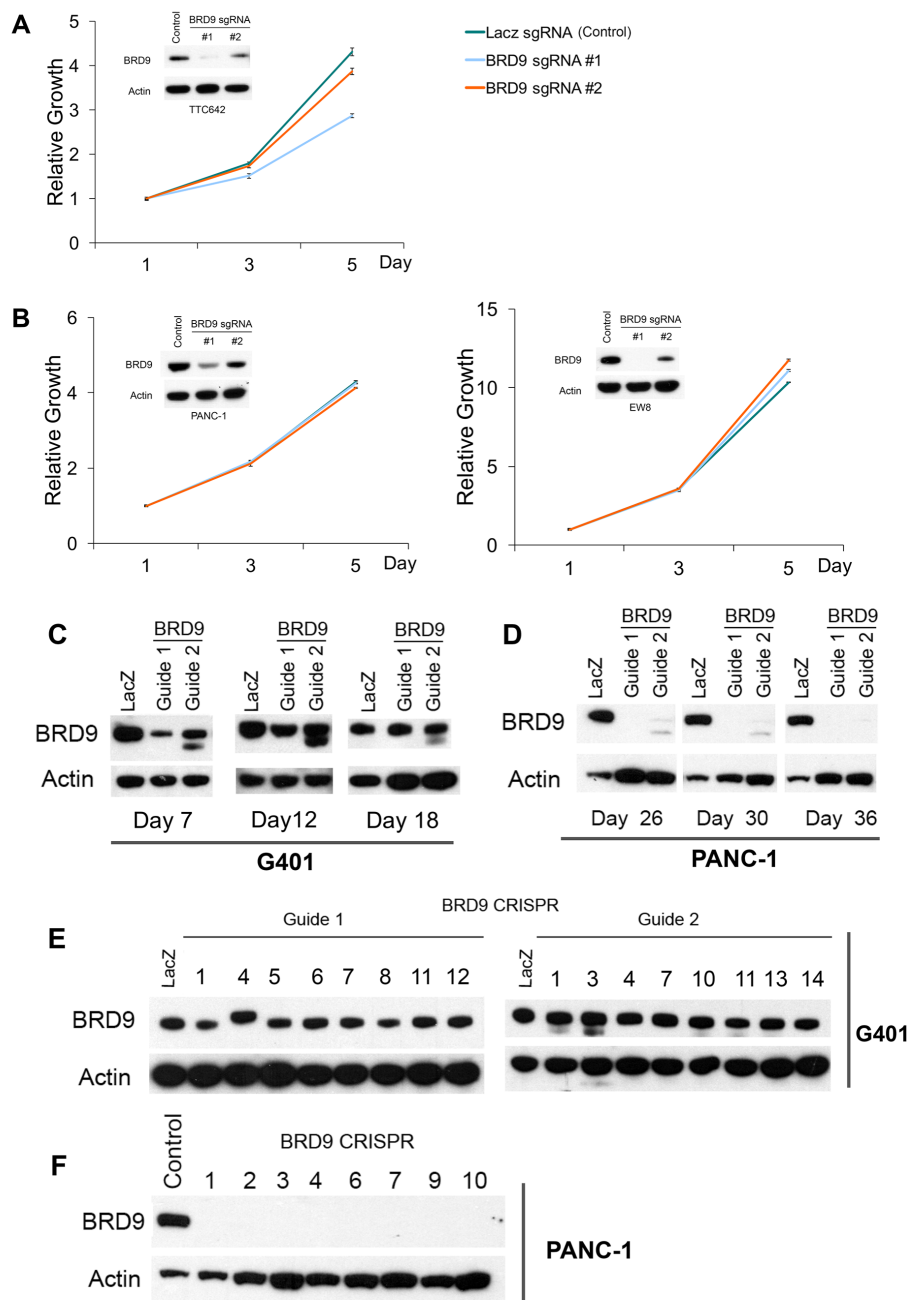

## Supplementary Figure 1

**A.** BRD9 deletion significantly impairs MRT cell line TTC642 proliferation ( $n=3$ , error bars: SD)

**B.** BRD9 deletion has no effect on PANC-1 and EW8 cell proliferation ( $n=3$ );

**C.** Western blot showing rapid negative selection of BRD9 wildtype (unedited) G401 cells;

**D.** Western blot showing long-lasting BRD9 knock-out (edited) PANC-1 cells;

**E.** Western blot showing all single cell clones recovered from G401 cells were BRD9 wild-type ( $n=16$ );

**F.** Western blot showing all single cell clones recovered from PANC-1 cells were BRD9 knock-out ( $n=8$ ).

## Supplementary Figure 2

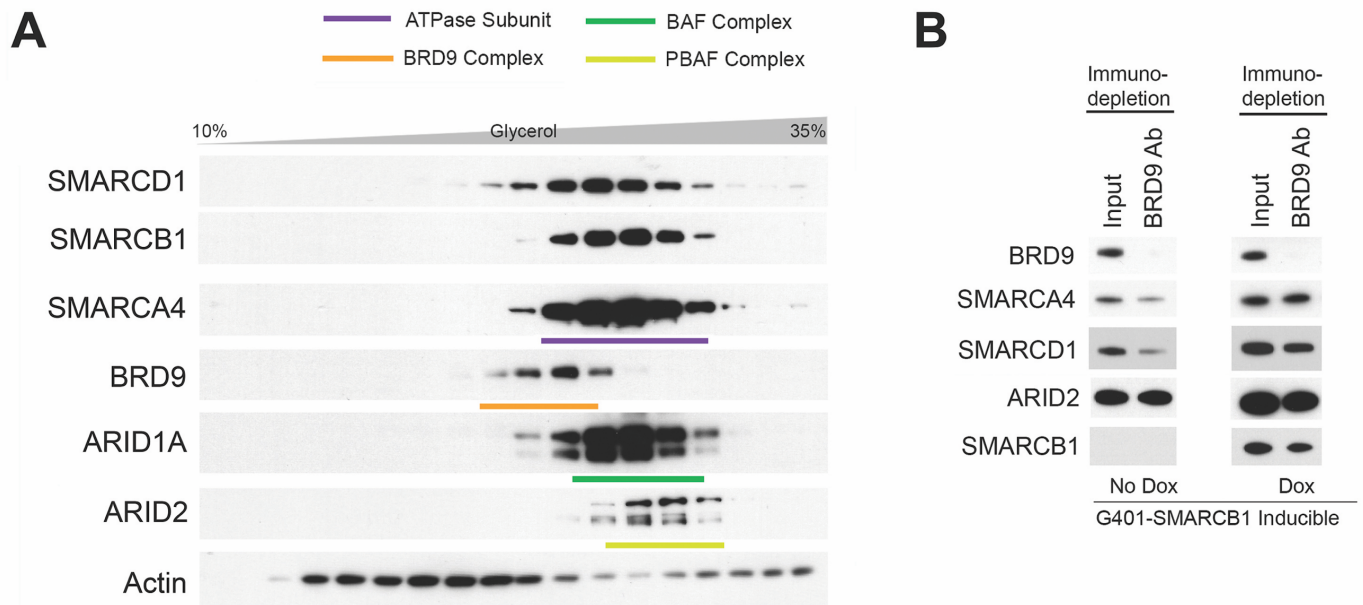

## Supplementary Figure 2

- A. Glycerol gradient of HCT116 (*SMARCB1*-WT) colon cancer cell line showing BRD9, BAF and PBAF complex subunits.
- B. Immuno-deletion of SWI/SNF subunits using BRD9 in G401 cells without or with *SMARCB1* addback

### Supplementary Figure 3

Range 1: 1 to 546 [Graphics](#) ▼ Next Match ▲ Previous Match

| Score         | Expect                                                       | Method                              | Identities         | Positives    | Gaps        |     |
|---------------|--------------------------------------------------------------|-------------------------------------|--------------------|--------------|-------------|-----|
| 269 bits(688) | 5e-86                                                        | Compositional matrix adjust.        | 208/590(35%)       | 328/590(55%) | 66/590(11%) |     |
| BRD7 1        | MGKHKHKHKSD-KHLYEEY----                                      | VEKPLKLVLVKVGNEVTELS                | TGSSSGHDSSLFEDKNDH | 55           |             |     |
| BRD9 1        | MGKHKHKHK++ + YE+Y                                           | +EKPLKLVLVKVG+EVTELS                | SGHDSS ++D++DH     | 58           |             |     |
| BRD7 56       | DKHKDRKRRKRRKGEKQIPG---                                      | EKGKRRRRVKEDKKRDRDRVENEAEKDLQCHAPVR |                    | 112          |             |     |
| BRD9 59       | ERERHKEKHKKSEKHLDEERRRKRKEEKKREREREHCDTEGEAD-DFDPGKKE        |                                     |                    | 117          |             |     |
| BRD7 113      | LDLPPEKPLTSSLAKQEEVEQTPLOEALNQI                              | MRQLQRKDP                           | SAFFSFPVTD         | FIAPGYSMII   | 172         |     |
| BRD9 118      | VEPPPPDRPVRACRTPAENESTPIQQLLEH                               | LRQLQRKDP                           | PHGFFAFPVTD        | DAIAPGYSMII  | 177         |     |
| BRD7 173      | KHPMDFSTMKEKIKNNDYQSIEELKDNFKLMCTNAMIYNKPETIYYKAAKLLHSGMKIL  |                                     |                    |              | 232         |     |
| BRD9 178      | KHPMDF TMK+KI N+Y+S+ E K +FKLMC NAM YN+P+T+YK AKK+LH+G K++   | KHPMDFGTMKDKIVANEYKSVTEFKADF        | KLMCDNAMYNRPD      | TVYYKLA      | KILHAGFKMM  | 237 |
| BRD7 233      | SQERIQSLKQSIDFMADLQKTRKQKDGTDTSQSGEDGGCWQREREDSGDAEAHAFKSPSK |                                     |                    |              | 292         |     |
| BRD9 238      | SKQ--AALLGNEDTAVEEPVPEVVPVQVETAKKS-----                      |                                     |                    |              | 274         |     |
| BRD7 293      | ENKKKDKDMLLEDKFKSNNL-----                                    | EREQEQLDRIVKESGGKLT                 | RRLVNSQCE          | FERRKPD      | 346         |     |
| BRD9 275      | EVISC---MFEPEGNACSLTDSTAEELVLA                               | VEHADEARDRINRFL                     | PGGKMGYL           | KRNGD        | 331         |     |
| BRD7 347      | GTTTLGLLHPVDPIVGEPCYCPVRLGMTTGR                              | LQSGVNTLQGF                         | KEDKRNKVT          | PVLYLNYGF    | 406         |     |
| BRD9 332      | GSLLYSVVNTAEFDADEEETHPVDLSSLSSKLL                            | PGFTTL-GFKDERRNKVT                  |                    | ---FLSSA-    | 386         |     |
| BRD7 407      | YSSYAPHYDSTFANISKDDSDLIYSTYGEDSD                             | LPSDFS                              | SIHEFLATCQD        | YPYVMADSLLDV | 466         |     |
| BRD9 387      | TTALSMQNNSVFGDLKSDEMELLYSAYGDET                              | GVQCALS                             | QEFVKDAGS          | YSKVVDDLLDQ  | 446         |     |
| BRD7 467      | LTKGGHSRTLQEMEMSL-----                                       | PEDE---GHTR                         | LDTAKEMEITE        | VEPPGR       | LDSSTQDRL   | 518 |
| BRD9 447      | ITGGDHSRTLFLQLQRRNVPMKPPDEAKVGD                              | ALGDSSGSVLD                         | FMSVK-----         |              | SYPDVS      | 499 |
| BRD7 519      | IALKAVTNFGVPVEVDFDSEAEIFQKKLDET                              | TRLLRELQEAQ                         | NERLSTRP           | 568          |             |     |
| BRD9 500      | + + +++ G + D +++ + LDET +LL++L                              | EAQ ER +RP                          |                    |              | 546         |     |

Bromodomain

DUF3512

**Supplementary Figure 3. Amino acid sequence comparison between BRD9 and BRD7. While the bromodomains share high similarity, the DUF3512 domains are highly distinct.**

## Supplementary Figure 4

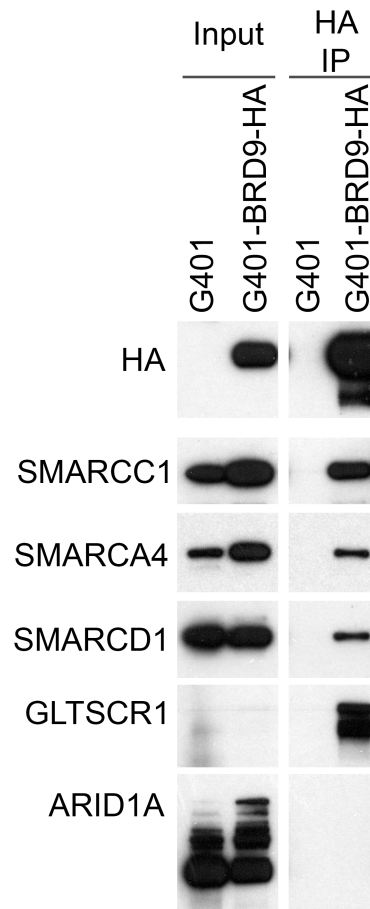

### Supplementary Figure 4. C-terminal HA tagging does not affect the formation of BRD9-SWI/SNF subcomplex

HA-tag IP in parental G401 cells and G401-BRD9-HA (C-terminus) cells and Western blot of indicated subunits, showing the formation of BRD9-SWI/SNF subcomplex.

## Supplementary Figure 5

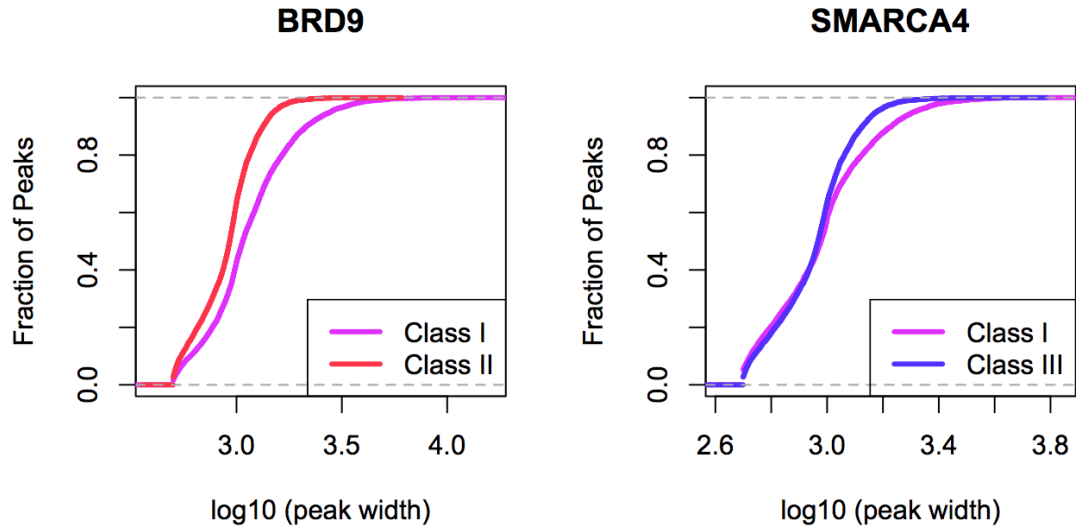

## Supplementary Figure 5.

The cumulative distribution of BRD9 and SMARCA4 peak width in different peak categories in G401 cell.

## Supplementary Figure 6

**A**

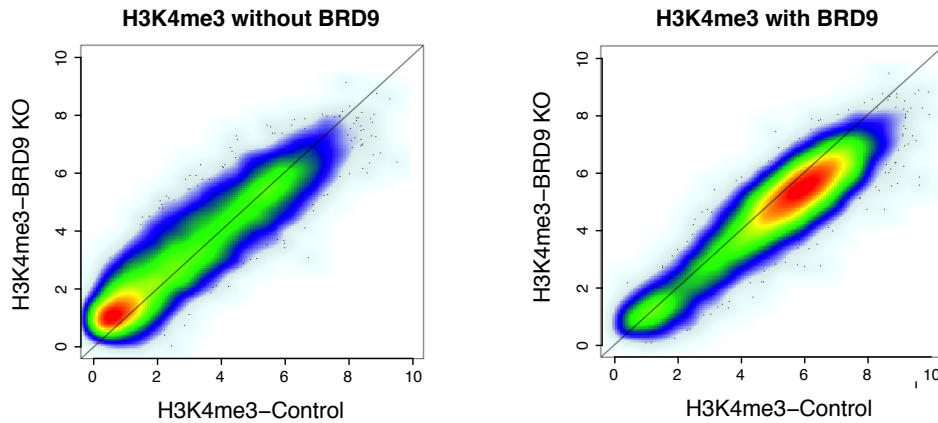

**B**

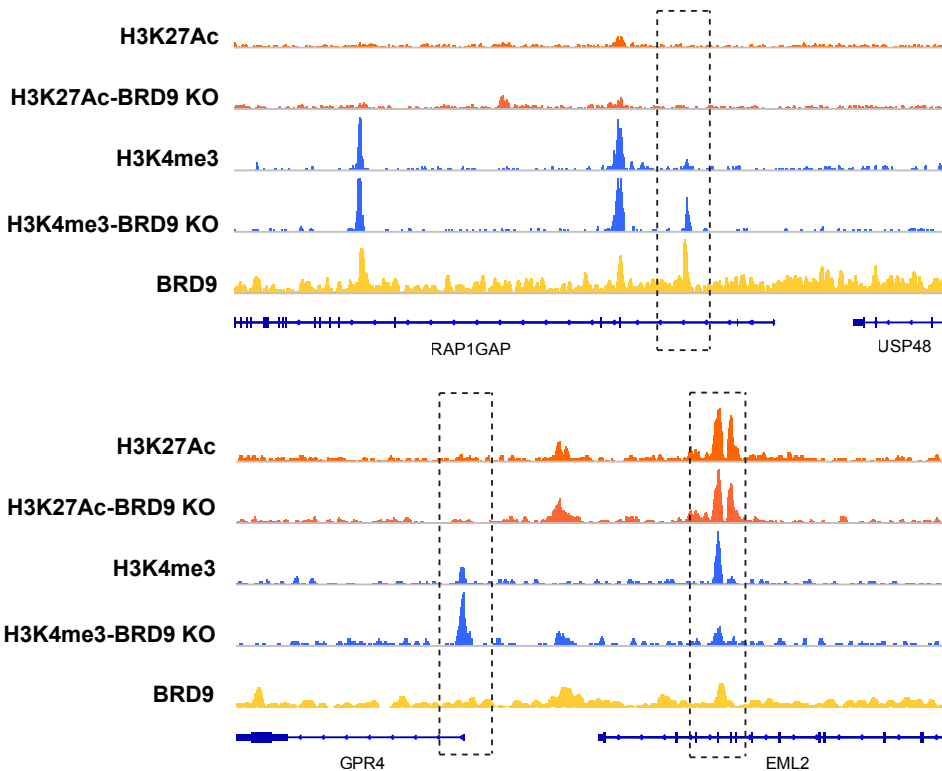

### Supplementary Figure 6.

**A.** Comparison of the average H3K4me3 ChIP enrichment over H3K4me3 with BRD9 and without BRD9 binding sites between H3K4me3-Control and H3K4me3-BRD9 KO cells. Loss of BRD9 leads to bidirectional changes of H3K4me3. All experiments are performed in G401 cell.

**B.** Representative screenshots of H3K27ac, H3K4me3, and BRD9 in G401 cell without or with BRD9 deletion (KO) showing local changes of H3K4me3 upon BRD9 deletion: increased H3K4me3 signal (upper, lower left) and decreased K27Ac signal (lower right).

## Supplementary Figure 7

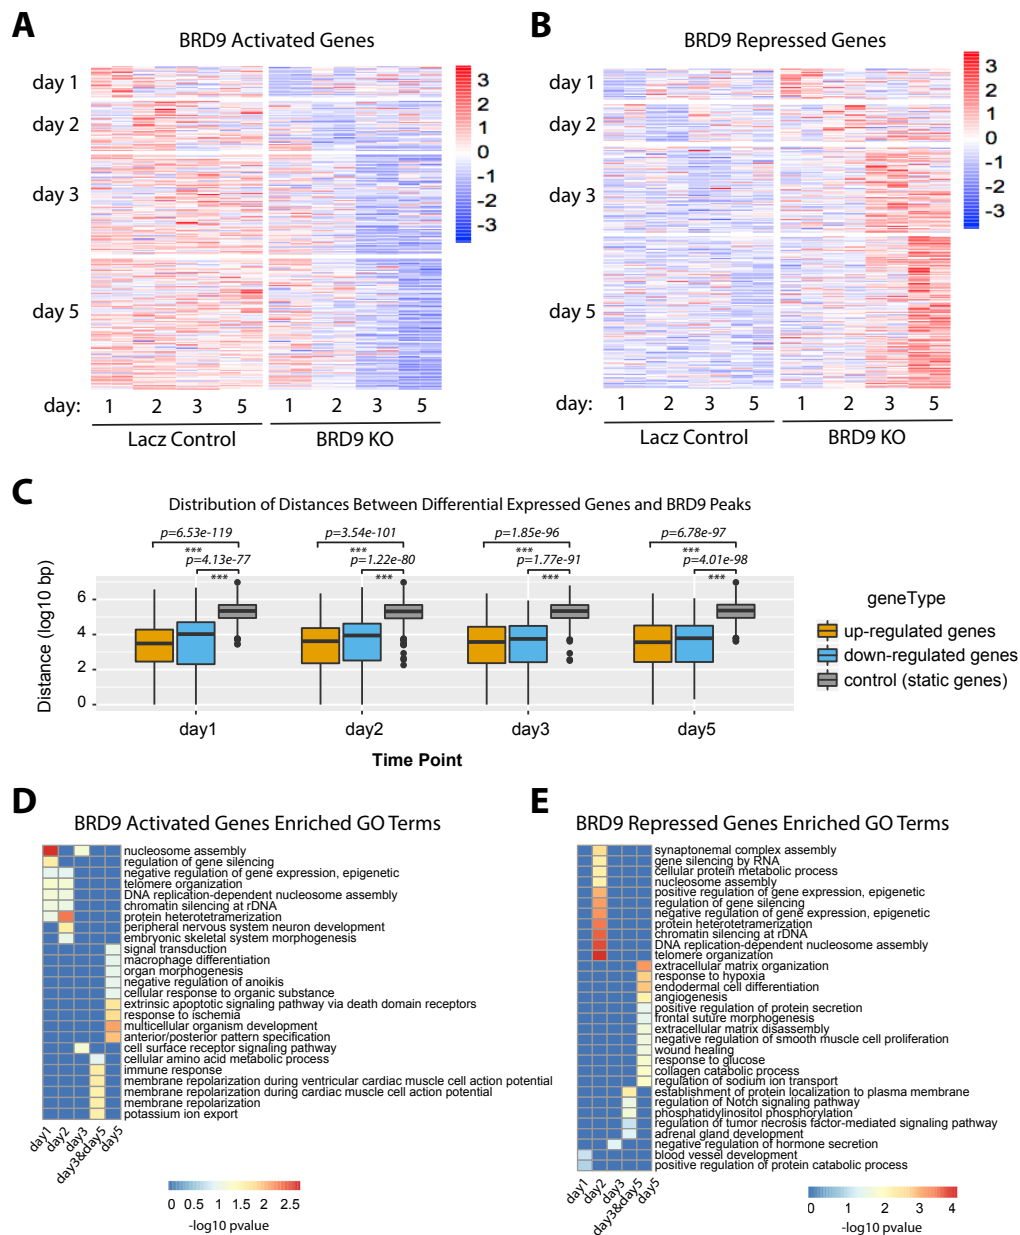

### Supplementary Figure 7.

**A-B.** Scaled TPM of BRD9 (A) activated genes (expression decreased after KD BRD9) and (B) repressed genes (expression increased after KD BRD9) across different time points (day1, 2, 3, and 5) in Lacz control and BRD9 KO condition in G401 cell. Each time point has two biological replicates.

**C.** The distribution of distances between BRD9 up-regulated (orange), down-regulated (blue), static (used as control genes, grey) genes and BRD9 binding sites. P-values were calculated by Kolmogorov–Smirnov test.

**D-E.** The distribution of BRD9 (D) activated and (E) repressed genes enriched GO terms in different time points. Day3day5 presents genes differentially expressed in both day3 and day5.



## Supplementary Figure 8

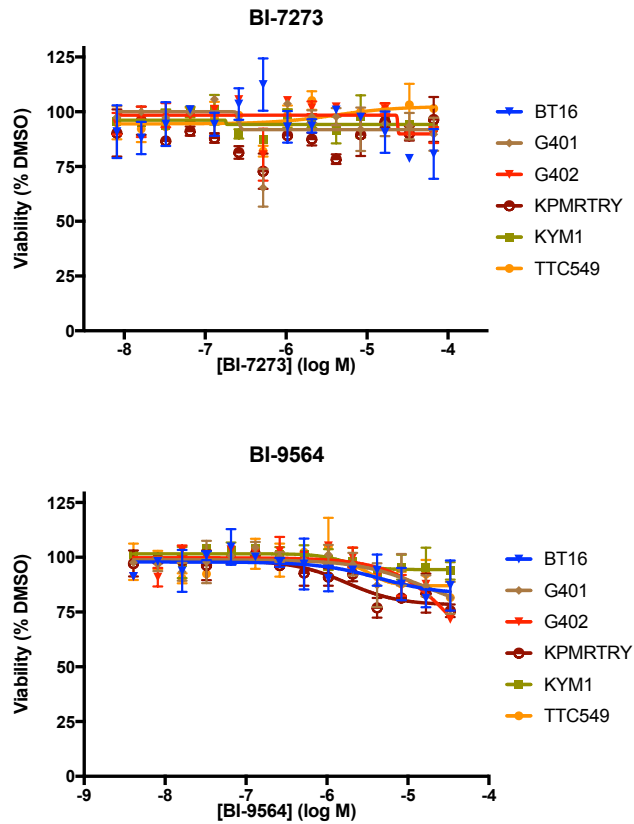

### Supplementary Figure 8.

Treatment of BRD9 bromodomain specific inhibitors BI-7273, BI-9564 on a panel of RT cell lines showing that RTs are insensitive to BRD9 bromodomain inhibition.

Figure 2E

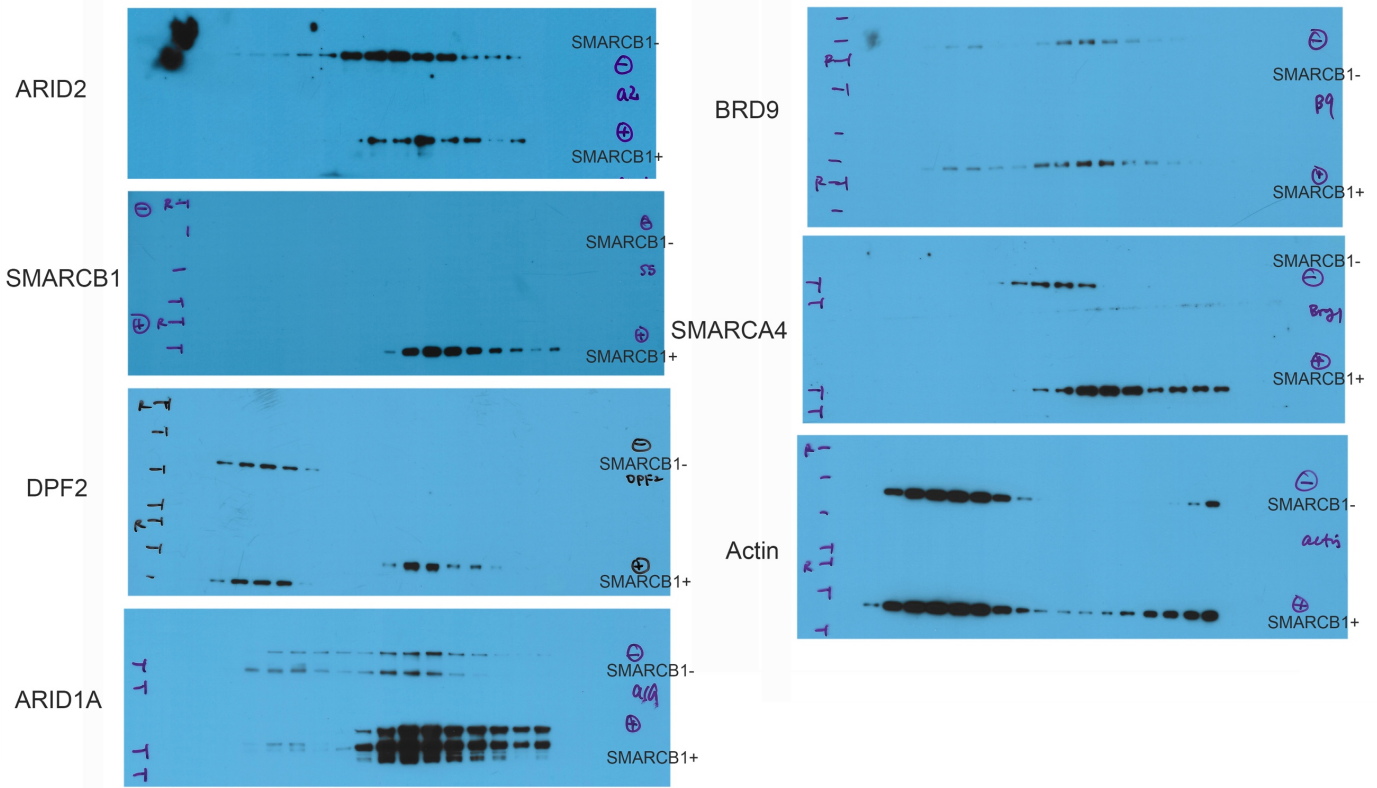

Raw Western blot scans related with Figure 2E

Figure 2F

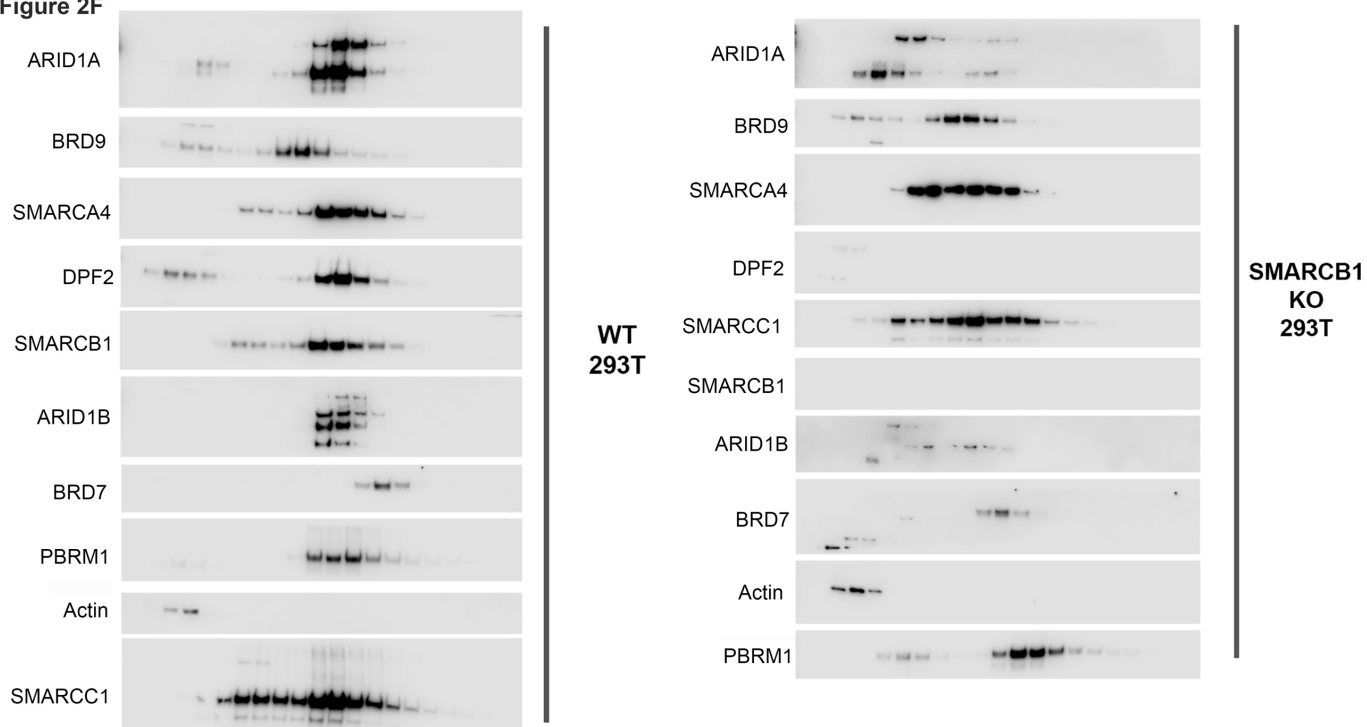

Supplementary Figure 2

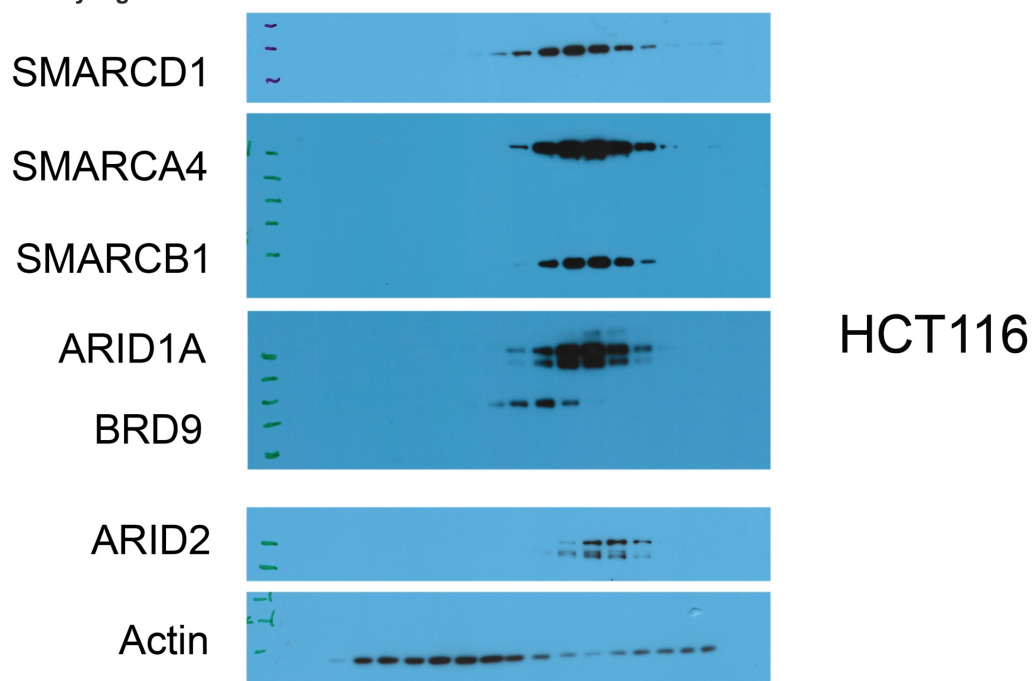

Raw Western blot scans related with Figure 2F and Supplementary Figure 2.

**Figure 3B**

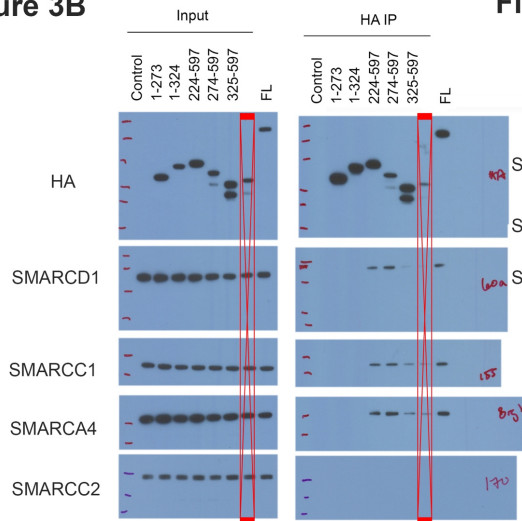

**Figure 3C**

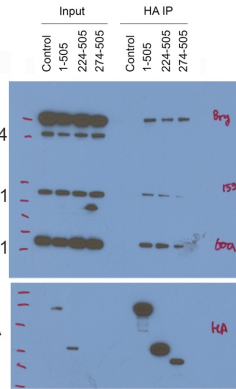

**Figure 3E**

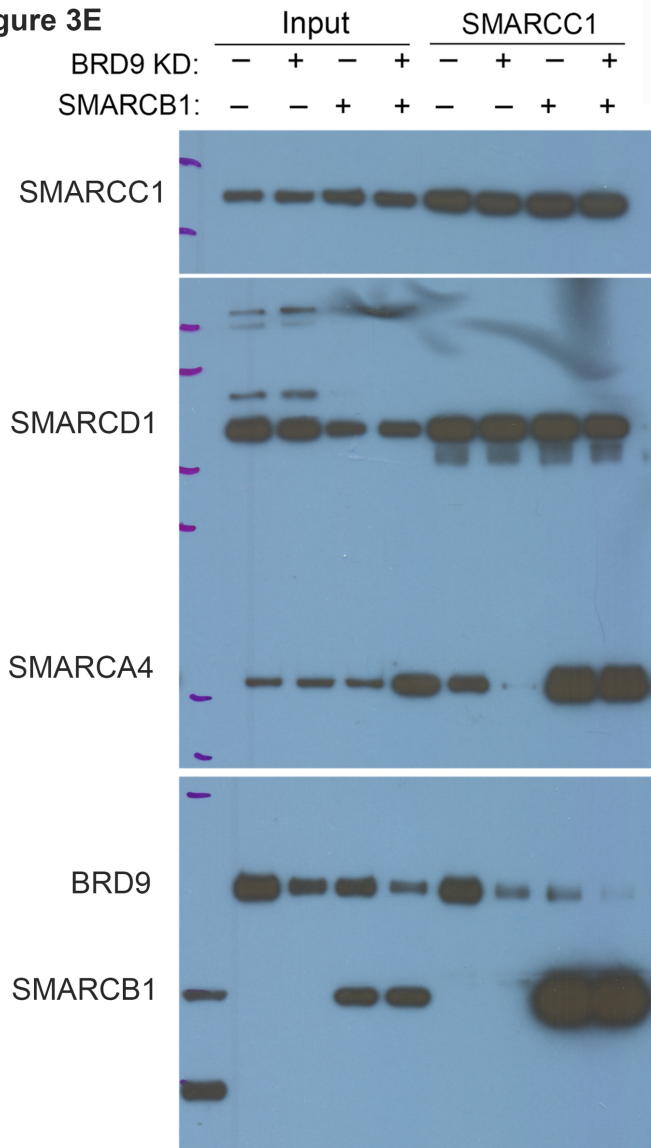

Raw Western blot scans related with Figure 3B,C and E

Figure 3D

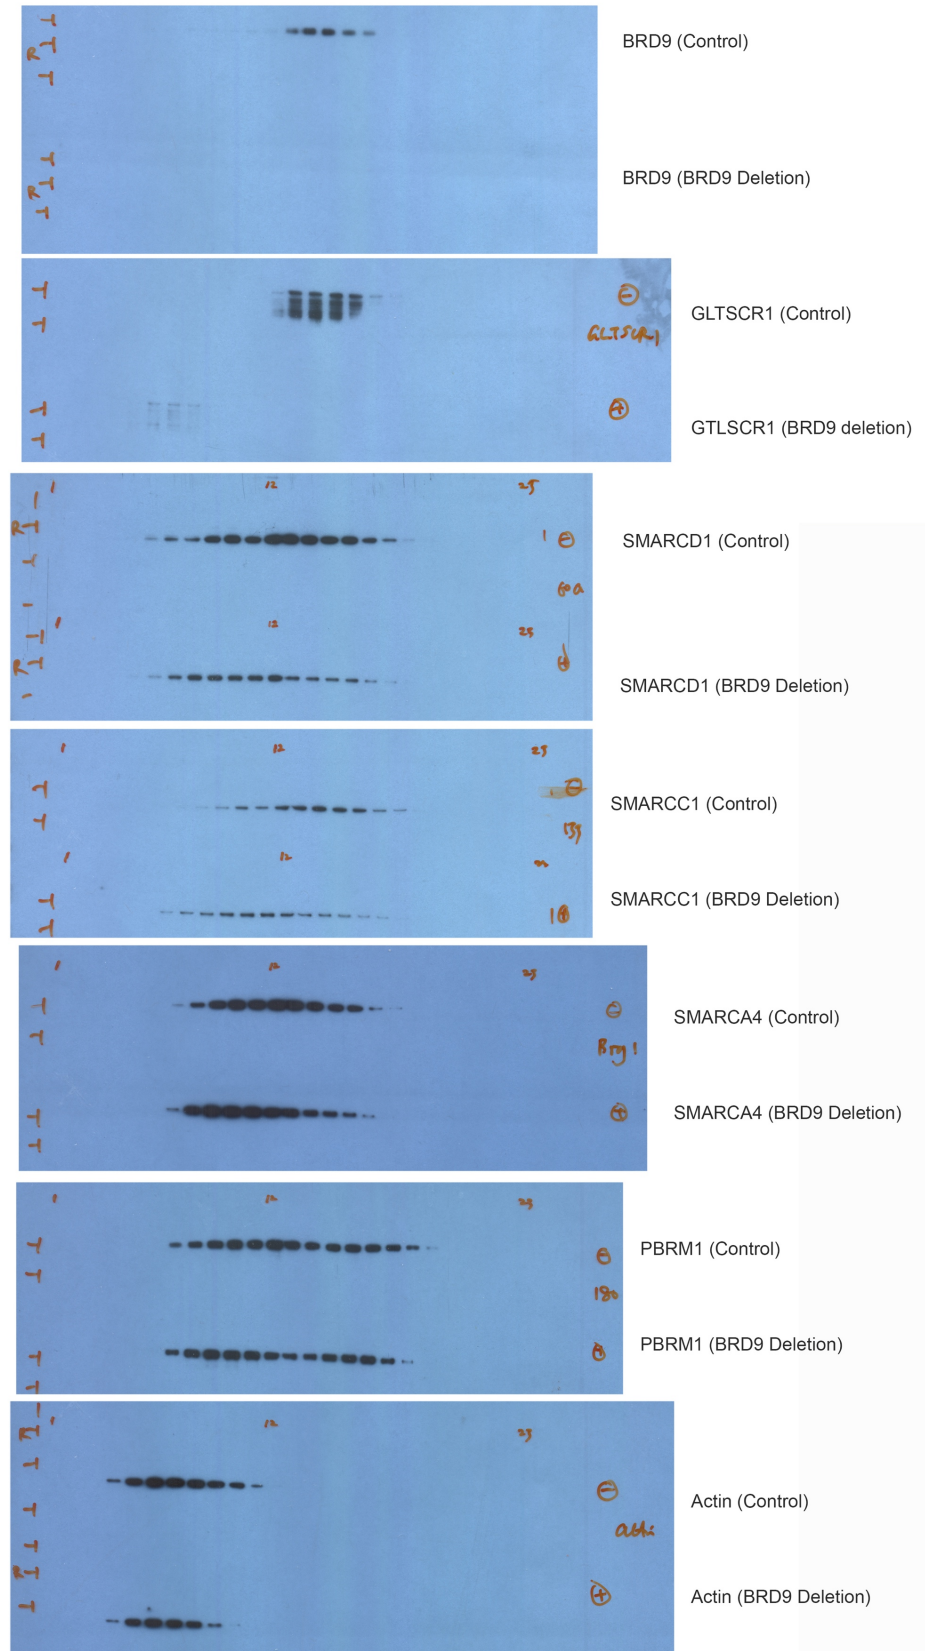

Raw Western blot scans related with Figure 3D
